# Supplementary material for: Implementation of the Integrated Disease Surveillance and Response (IDSR) Strategy in Somalia, 2023-2024: A Mixed Method Evaluation of Performance, Challenges, and Opportunities for Strengthening Health Security
Source: Research Square preprint supplement (doi:10.21203/rs.3.rs-8047769/v1), 2025-11-07
Supplement: Supplementary file 1 [file 0ece0b494cb26b6b0ecefcab.docx]

| **Section/Topic** | **Item No** | **Checklist item** | **Reported on page No** |
| --- | --- | --- | --- |
| **Domain 1: Research team and reﬂexivity** | | | |
| Personal Characteristics | | | |
| *Interviewer/facilitator* | 1 | Interviews were conducted by trained research team members from different institutions including Universities, MOH and hospitals | 1 |
| *Credentials* | 2 | Interviewers held medical or public health degrees (MD, MPH, or equivalent). | 1 |
| *Occupation* | 3 | Researchers were public health officers, medical doctors and research coordinators in different institutions | 1 |
| *Gender* | 4 | Both male and female researchers participated the study | 1 |
| *Experience and training* | 5 | Researchers were trained in IDSR, data collection tool, and thematic analysis prior to data collection. | 1 |
| Relationship with participants | | | |
| *Relationship established* | 6 | Limited relations with some members | 1 |
| *Participant knowledge of the interviewer* | 7 | Participants were informed about the study purpose, confidentiality, and the researchers’ roles within the health system. | 1 |
| *Interviewer characteristics* | 8 | Some interviewers were epidemiologists with professional experience in the IDSR. They had an interest in improving IDSR implementation and data quality. The team acknowledged potential bias due to their involvement in the health system but minimized it through reflexive journaling, team discussions, and validation of themes by independent coders. | 1 |
| **Domain 2: study design** | | | |
| Theoretical framework | | | |
| *Methodological orientation and*  *Theory* | 9 | The study performed convergent mixed methods cross-sectional using both quantitative and qualitative data. Qualitative data was guided by a reflexive thematic analysis framework (Braun & Clarke, 2006) | 6 |
| Participant selection | | | |
| *Sampling* | 10 | Purposive sampling of 50 key interview representing all federal member states and Banadir Regional Administration | 7 |
| *Method of approach* | 11 | Face to face | 5 |
| *Sample size* | 12 | 50 participants | 7 |
| *Non-participation* | 13 | None | 7 |
| *Setting of data collection* | 14 | Health centers and the hospitals | 7 |
| *Presence of non-participants* | 15 | No | 7 |
| *Description of sample* | 16 | Participants included facility in-charges; surveillance focal points; data Managers; and over & under five consultants | 6 |
| Data collection | | | |
| *Interview guide* | 17 | A semi-structured IDSR supportive supervision tool guided interview. piloted in 3 facilities before rollout | 7 |
| *Repeat interviews* | 18 | No repeated interviews carried out | 7 |
| *Audio/visual recording* | 19 | No. Only notes were taken | 7 |
| *Field notes* | 20 | Field notes made during and/or after the interview | 7 |
| *Duration* | 21 | What was Each interview lasted approximately 15–20 minutes. | 7 |
| *Data saturation* | 22 | Yes, data saturation discussed was achieved by 40th interview | 7 |
| *Transcripts returned* | 23 | Transcripts were not returned to participants due the logistical limitations | 7 |
| **Domain 3: Analysis and ﬁndings**  **Data analysis** | | | |
| *Number of data coders* | 24 | Two independent data coders coded the data and analyzed the transcript | 8 |
| *Description of the coding tree* | 25 | Codes were grouped under six main themes and subthemes reflecting IDSR core and supportive functions. | 8 |
| *Derivation of themes* | 26 | Themes were derived from the data | 8 |
| *Software* | 27 | Nvivo software was used for coding and managing data | 8 |
| *Participant checking* | 28 | Researchers provided preliminary findings to the participants | 8 |
| Reporting | | | |
| *Quotations presented* | 29 | Illustrative participant quotes were included in the results section, identified by facility and state. | 8 |
| *Data and ﬁndings consistent* | 30 | Yes, findings were consistency with the data presented | 8 |
| *Clarity of major themes* | 31 | Yes, major themes clearly presented in the ﬁndings | 8 |
| *Clarity of minor themes* | 32 | Variations of minor themes were described | 8 |
